# Supplementary material for: Robust and self-healable nanocomposite physical hydrogel facilitated by the synergy of ternary crosslinking points in a single network
Source: Royal Society of Chemistry journal article supplement (doi:10.1039/c6tb01606e), 2016-01-01
Supplement: c6tb01606e1.pdf [file c6tb01606e1.pdf]

## Electronic Supporting information

### Robust and self-healable nanocomposite physical hydrogel facilitated by the synergy of ternary crosslinking points in a single network

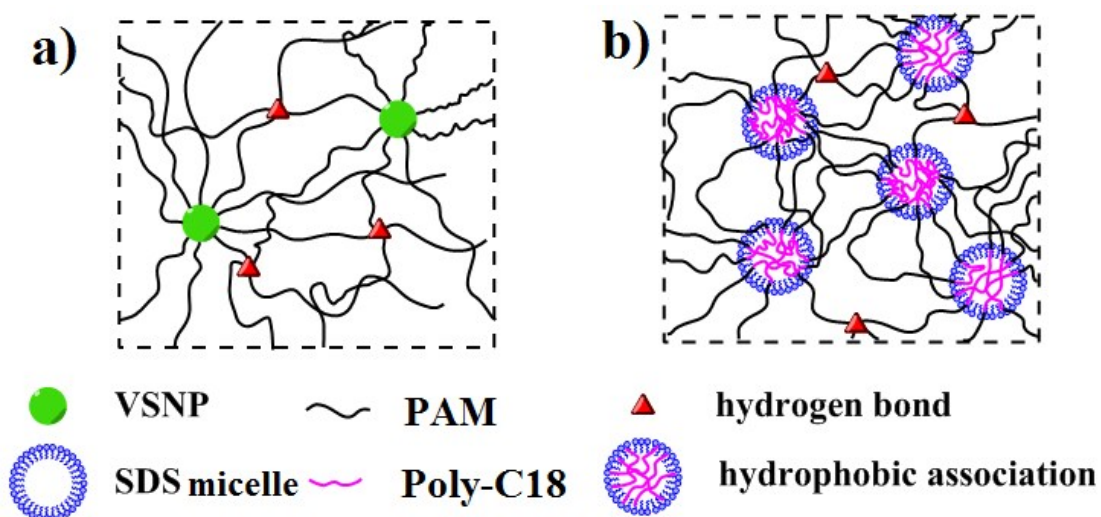

**Scheme S1.** a) the DC-NCP gel crosslinked by hydrogen bonds among the grafted polymer chains as physical crosslinking points and VSNPs as analogous crosslinking points, and b) the DC-L gel crosslinked by hydrogen bonds among the hydrophilic PAM block and hydrophobic associations among the hydrophobic poly-C18 block.

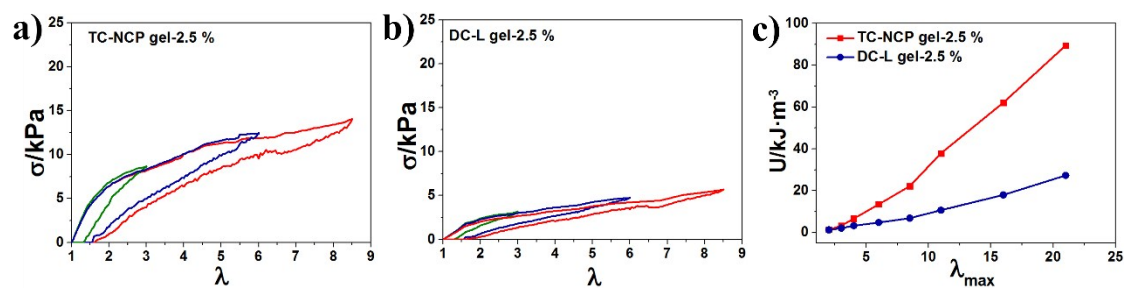

**Figure S1.** Loading–unloading experiments performed at different maximum stretch ratio ( $\lambda_{\text{max}}$ ) for a) the TC-NCP gel-2.5 %, and b) the DC-L gel-2.5 %, and c) dissipated energy ( $U$ ) of the gels as a function of  $\lambda_{\text{max}}$ .

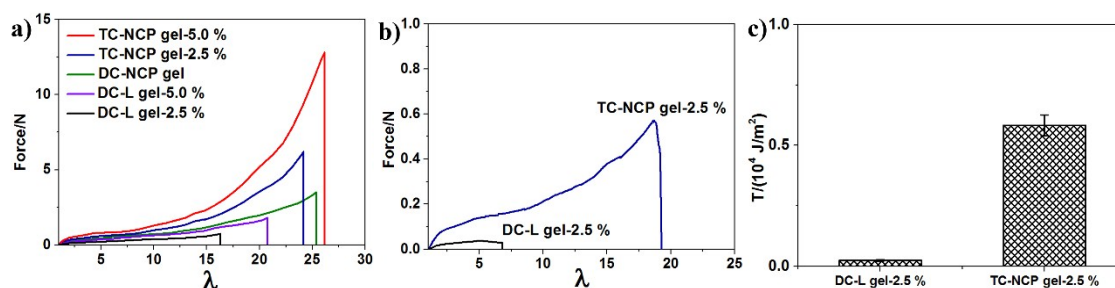

**Figure S2.** The force-stretch ratio ( $\lambda$ ) curves for a) the unnotched and b) the notched film samples, c) the calculated tearing energy for the DC-L gel-2.5 %, and the TC-NCP gel-2.5 %. All the gel samples contain the same water content of 90 %, the VSNP content is fixed at 0.4 % relative to the weight of the monomer for the NCP gels.

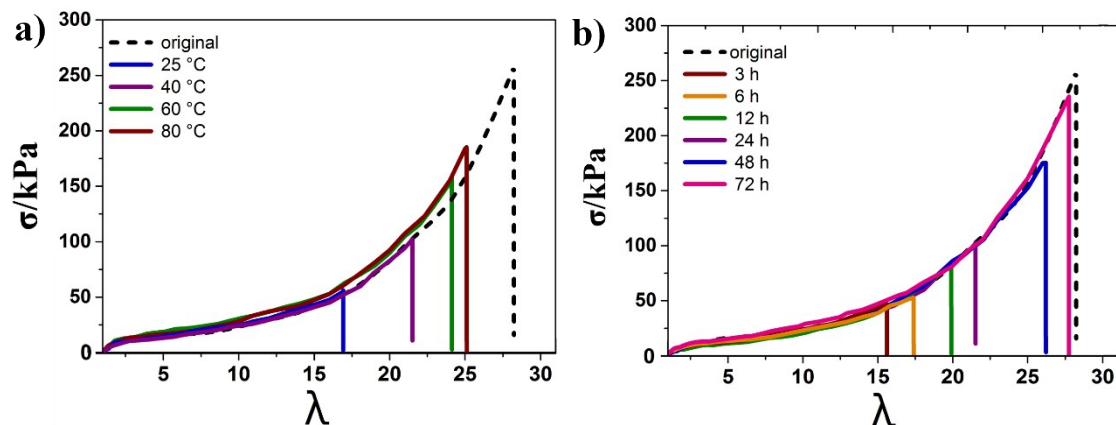

**Figure S3.** a) Stress-stretch ratio ( $\sigma$ - $\lambda$ ) curves of the original and the healed TC-NCP gel-5.0 % for 24 h at different temperature, and b) for different time at 40 oC.

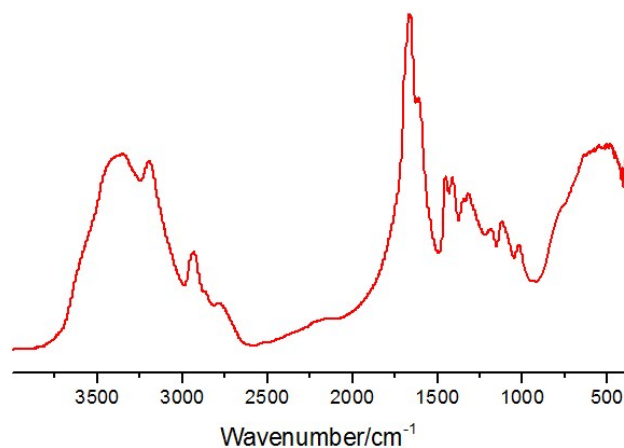

**Figure S4.** The FTIR results of DC-NCP gel are shown in Fig. S4. The FTIR spectrum of lyophilize DC-NCP gel is almost the same with that of PAM (see also the ESI of J. Mater. Chem. B, 2015, 3, 1187), except a characterist absorption peak of Si-C at 1023  $\text{cm}^{-1}$ . This result indicates that all the vinyl groups on the surface of VSNPs have reacted during the polymerization process, i.e. polymer chains are grafted on the surface of VSNPs.
